# Supplementary material for: Influence of Pleistocene climatic oscillations on the phylogeography and demographic history of endemic vulnerable trees (section Magnolia) of the Tropical Montane Cloud Forest in Mexico
Source: PeerJ. 2021 Sep 28;9:e12181. doi: 10.7717/peerj.12181 (PMC8485838; doi:10.7717/peerj.12181)
Supplement: Supplemental Information 1 [file peerj-09-12181-s001.xlsx]

## Sheet: Supplemental
ID	Species	State	Locality	Date	Latitude	Longitude	Ocurrences	Source
Ms23	M. schiedeana	Hidalgo	Zacualtipán de Ángeles , La Mojonera	2019-02-19	20.6337	-98.6144	Training	Collected
Ms102	M. schiedeana	Hidalgo	Tlanchinol, Tlanchinol	2019-02-20	20.9902	-98.6264	Training	Collected
Ms134	M. schiedeana	Hidalgo	San Bartolo Tutotepec, Tutotepec	2019-02-21	20.4136	-98.2796	Training	Collected
Ms156	M. schiedeana	Hidalgo	San Bartolo Tutotepec, Medio Monte	2019-02-21	20.4099	-98.235	Training	Collected
Ms168	M. schiedeana	Hidalgo	Tenango de Doria, El Cirio	2019-02-22	20.3206	-98.2022	Training	Collected
Ms195	M. schiedeana	Hidalgo	Tenango de Doria, El Gosco	2019-02-22	20.3228	-98.2499	Training	Collected
Ms313	M. schiedeana	Puebla	Tlatlauquitepec, San Andrés	2019-09-09	19.9166	-97.4981	Training	Collected
Ms317	M. schiedeana	Puebla	Carretera a Teziutlán	2019-09-10	19.8412	-97.3398	Training	Collected
Mp4	M. pedrazae	Querétaro	Las Flores		21.2254	-99.1568	Training	Collected
Mp61	M. pedrazae	Querétaro	La Yesca	2017-04-25	21.2231	-99.1256	Training	Collected
Mp17	M. pedrazae	SLP	Las Flores	2017-04-06	21.4513	-99.0858	Training	Collected
Mp91	M. pedrazae	SLP	Silleta		21.4563	-99.0478	Training	Collected
Mp46	M. pedrazae	SLP	Coronel	2017-04-07	21.4127	-99.0561	Training	Collected
Ms231	M. schiedeana	Veracruz	Acajete, El Zapotal	2019-03-25	19.5032	-97.0091	Training	Collected
Ms242	M. schiedeana	Veracruz	Xalapa, Reserva Ecológica FXC	2019-03-26	19.5158	-96.9462	Training	Collected
Ms249	M. schiedeana	Veracruz	Acajete, Mesa de la Yerba	2019-04-16	19.5599	-97.0156	Training	Collected
Ms276	M. schiedeana	Veracruz	Banderilla, La Martinica	2019-04-16	19.5831	-96.9477	Training	Collected
Ms287	M. schiedeana	Veracruz	Acatlán, Volcán de Acatlán	2019-04-17	19.6844	-96.8541	Training	Collected
Ms326	M. schiedeana	Veracruz	Yecuatla, Yehualasco	2019-09-11	19.8817	-96.7925	Training	Collected
Ms344	M. schiedeana	Veracruz	Misantla, Misantla	2019-09-11	19.9354	-96.8503	Training	Collected
Ms346	M.s. oax	Oaxaca	Santiago Comaltepec	2019-11-25	17.5905	-96.4456	Training	Collected
Ms349	M.s. oax	Oaxaca	Santiago Comaltepec	2019-11-25	17.5906	-96.4953	Training	Collected
1)	M.s. oax	Oaxaca	San Lucas Zoquiapam, cerca de Plan de Guadalupe		18.1278	-96.9565	Training	Collected
2)	M.s. oax	Oaxaca	Mazatlán Villa de Flores, cerca de San Pedro de los Encinos		18.069	-96.8796	Training	Collected
3)	M.s. oax	Oaxaca	Santiago Comaltepec, cerca de Metates		17.6908	-96.3275	Training	Collected
4)	M.s. oax	Oaxaca	Totontepec Villa de Morelos		17.25	-96.0333	Training	Collected
1	M. schiedeana	Veracruz	Acajete, 1 km de la Desviación a Mazatepec Carretera Perote-Xalapa		19.6167	-97.0333	Test	Vásquez-Morales et al. 2014
2	M. schiedeana	Veracruz	Acajete, Plan de Sedeño		19.5667	-97	Test	Vásquez-Morales et al. 2014
3	M. schiedeana	Veracruz	Acajete, San Ándres Tlalnehuayocán		19.5	-97.0167	Test	Vásquez-Morales et al. 2014
4	M. schiedeana	Veracruz	Alto Lucero de Gutiérrez Barrios, Cerro La Cima		19.7942	-96.7108	Test	Vásquez-Morales et al. 2014
5	M. schiedeana	Veracruz	Banderilla		19.5833	-96.8833	Test	Vásquez-Morales et al. 2014
6	M. schiedeana	Veracruz	Banderilla, La Martinica		19.5667	-96.9333	Test	Vásquez-Morales et al. 2014
7	M. schiedeana	Veracruz	Coatepec, Cinco Palos		19.4689	-96.98	Test	Vásquez-Morales et al. 2014
8	M. schiedeana	Veracruz	Huayacocotla, Agua de la Calabaza, Carretera a Huayacocotla		20.3833	-98.4833	Test	Vásquez-Morales et al. 2014
9	M. schiedeana	Veracruz	Huayacocotla, Huayacocotla		20.535	-98.4783	Test	Vásquez-Morales et al. 2014
10	M. schiedeana	Veracruz	Juchique de Ferrer		18.8	-96.7667	Test	Vásquez-Morales et al. 2014
11	M. schiedeana	Veracruz	Otilpán, Naranjillo, Acajete, Mesa de la Yerba		19.5333	-96.9167	Test	Vásquez-Morales et al. 2014
12	M. schiedeana	Veracruz	Rafael Lucio, carretera Banderilla-Perote, Rancho Santa Bárbara		19.6167	-96.9833	Test	Vásquez-Morales et al. 2014
13	M. schiedeana	Veracruz	Tenochtitlán, vereda que sube al cerro el cipres (gigante), 3 km SE Tenochtitlán		19.7242	-96.8981	Test	Vásquez-Morales et al. 2014
14	M. schiedeana	Veracruz	Yecuatla		18.8	-96.8167	Test	Vásquez-Morales et al. 2014
15	M. schiedeana	Veracruz	Yecuatla, Los Capulines		19.8175	-96.8286	Test	Vásquez-Morales et al. 2014
16	M. schiedeana	Veracruz	Yecuatla, Loma de Santa Rita		19.7172	-96.8214	Test	Vásquez-Morales et al. 2014
17	M. schiedeana	Veracruz	Yecuatla, Yecuatlán		19.8775	-96.7942	Test	Vásquez-Morales et al. 2014
18	M. schiedeana	Hidalgo	El Damo		20.3219	-98.2017	Test	Vásquez-Morales et al. 2014
19	M. schiedeana	Hidalgo	Noroeste de Tlanchinol		21.0108	-98.6775	Test	Vásquez-Morales et al. 2014
20	M. schiedeana	Hidalgo	Noroeste de Tlanchinol		21.0108	-98.6275	Test	Vásquez-Morales et al. 2014
21	M. schiedeana	Querétaro	Noeste de Valle Verde		21.5442	-99.1442	Test	Vásquez-Morales et al. 2014
22	M. schiedeana	Querétaro	Jalpan de Serra		21.2217	-99.4733	Test	Vásquez-Morales et al. 2014
23	M. schiedeana	Querétaro	Acatitlán de Zaragoza		21.2064	-99.1881	Test	Vásquez-Morales et al. 2014
24	M. schiedeana	Veracruz	Volcán Acatlán		19.6836	-96.8539	Test	Vásquez-Morales et al. 2017
25	M. schiedeana	Veracruz	La Martinica, Banderilla		19.5819	-96.9486	Test	Vásquez-Morales et al. 2017
26	M. schiedeana	Veracruz	Zacualtipán, 5 km SE, Paraje El Hayal, Ejido La Mojonera		20.6083	-98.625	Test	Vásquez-Morales et al. 2015
27	M. schiedeana	Veracruz	Paraje El Hayal, ejido La Mojonera 5 Km SE de Zacualtipan		20.6417	-98.5917	Test	Gbif
28	M. schiedeana	Veracruz	Cerca de Zacualtipán		20.6583	-98.6583	Test	Gbif
29	M. schiedeana	Veracruz	Eloxochitlan, 4 km al E		20.7556	-98.7753	Test	Gbif
30	M. schiedeana	Veracruz	Xucayucan, 10 km al N Tlatlauquitepec, carretera de Mazatepec		19.8983	-97.4783	Test	Gbif
31	M. schiedeana	Veracruz	Mesa Monte de Chila, 19 km al SE de Chicontla, camino a Filomeno Mata		20.1903	-97.8083	Test	Gbif
32	M. schiedeana	Querétaro	Landa, Joya Del Hielo y alrededores		21.1817	-99.32	Test	Gbif
33	M. schiedeana	Veracruz	Acatitlán de Zaragoza, 5 km NE		21.2417	-99.225	Test	Gbif
34	M. schiedeana	Veracruz	Joya del Hielo, 7 km al NE de Acatitlán de Zaragoza		21.2969	-99.1569	Test	Gbif
35	M. schiedeana	Veracruz	4-5 km W de La Parada		21.4133	-99.2761	Test	Gbif
36	M. schiedeana	Querétaro	Jalpan, 2 km WSW Valle Verde		21.498	-99.1751	Test	Gbif
37	M. schiedeana	Veracruz	Posada Loma, Fortin de Las Flores		18.8969	-96.9978	Test	Gbif
38	M. schiedeana	Veracruz	Loma Santa Rita		19.1415	-97.0423	Test	Gbif
39	M. schiedeana	Veracruz	Camino Ingenio El Rosario-Xico		19.42	-97.0083	Test	Gbif
40	M. schiedeana	Veracruz	Camino Ingenio El Rosario-Xico		19.4653	-97.125	Test	Gbif
41	M. schiedeana	Veracruz	Camino de Herradura de Xico-Corral de Rajas, cerca de Buenavista		19.475	-97.075	Test	Gbif
42	M. schiedeana	Veracruz	Veracruz near Xalapa Cumbre de Obispo		19.525	-96.975	Test	Gbif
43	M. schiedeana	Veracruz	Los Molinos		19.5933	-97.215	Test	Gbif
44	M. schiedeana	Veracruz	Cerro La Cima, La Sombra-Tierra Blanca		19.7497	-96.6942	Test	Gbif
45	M. schiedeana	Veracruz	Loma Santa Rita		19.75	-96.7667	Test	Gbif
46	M. schiedeana	Veracruz	Congregación de La Paz de Enriquez, Carretera Naolinco-Misantla		19.7706	-96.8219	Test	Gbif
47	M. schiedeana	Veracruz	El Mirador, Tenochtitlán		19.7972	-96.9183	Test	Gbif
48	M. schiedeana	Veracruz	Cerro de Villa Rica, cerca de Plan de La Flor		19.8	-96.7667	Test	Gbif
49	M. schiedeana	Veracruz	Agua de la Calabaza, camino a El Salto		20.625	-98.475	Test	Gbif
50	M. schiedeana	Veracruz	El Salto, Helechales, camino a las Tres Cascadas, Huayacocotla		20.6333	-98.4167	Test	Gbif
